# Supplementary material for: In VitroGrowth Inhibitory Activities of Natural Products from Irciniid Sponges against Cancer Cells: A Comparative Study
Source: Hindawi journal article supplement (doi:10.1155/2016/5318176), 2016-01-01
Supplement: f1 [file 5318176.f1.pdf]

## **Supplementary material**

### ***In vitro* growth inhibitory activities of natural products from irciniid sponges against cancer cells: a comparative study**

Yosr BenRedjem Romdhane,<sup>1</sup> Monia Elbour,<sup>1</sup> Marianna Carbone,<sup>2</sup> Maria Letizia Ciavatta,<sup>2</sup> Margherita Gavagnin,<sup>2</sup> Véronique Mathieu,<sup>3</sup> Florence Lefranc,<sup>4</sup> Leila Ktari,<sup>1</sup> Karim Ben Mustapha,<sup>1</sup> Abdellatif Boudabbous,<sup>5</sup> Robert Kiss,<sup>3</sup> and Ernesto Mollo<sup>2</sup>

<sup>1</sup>*Institut National des Sciences et Technologies de la Mer (INSTM), 2025 Salammbô, Tunis, Tunisia*

<sup>2</sup>*Consiglio Nazionale delle Ricerche (CNR), Istituto di Chimica Biomolecolare (ICB), 80078 Pozzuoli (Na), Italy*

<sup>3</sup>*Laboratoire de Cancérologie et de Toxicologie Expérimentale, Faculté de Pharmacie, Université Libre de Bruxelles (ULB), 1050 Brussels, Belgium*

<sup>4</sup>*Service de Neurochirurgie, Hôpital Erasme, ULB, 1070 Brussels, Belgium*

<sup>5</sup>*Laboratoire des Microorganismes et Biomolécules actives, Faculté des Sciences de Tunis, 2092 Tunis, Tunisia*

- S1. <sup>1</sup>H NMR spectrum of ircinin (**1**) from *S. spinosulus* (CDCl<sub>3</sub>, Bruker 400 MHz)
- S2. <sup>1</sup>H NMR spectrum of ircinin (**1**) from *S. spinosulus* (CD<sub>3</sub>OD, Bruker 600 MHz)
- S3. HSQC spectrum of ircinin (**1**) from *S. spinosulus* (CD<sub>3</sub>OD, Bruker 600 MHz)
- S4. ESI MS spectrum of ircinin (**1**) from *S. spinosulus*
- S5. <sup>1</sup>H NMR spectrum of sarcotin A (**2**) from *S. fasciculatus* (CDCl<sub>3</sub>, Bruker 400 MHz)
- S6. <sup>1</sup>H NMR spectrum of sarcotin A (**2**) from *S. fasciculatus* (CD<sub>3</sub>OD, Bruker 400 MHz)
- S7. <sup>1</sup>H-<sup>1</sup>H COSY spectrum of sarcotin A (**2**) from *S. fasciculatus* (CDCl<sub>3</sub>, Bruker 400 MHz)
- S8. HSQC spectrum of sarcotin A (**2**) from *S. fasciculatus* (CDCl<sub>3</sub>, Bruker 400 MHz)
- S9. HMBC spectrum of sarcotin A (**2**) from *S. fasciculatus* (CDCl<sub>3</sub>, *J* = 10Hz, Bruker 400 MHz)
- S10. ESI-MS spectrum of sarcotin A (**2**) from *S. fasciculatus*
- S11. <sup>1</sup>H NMR spectrum of variabilin (**3**) from *S. fasciculatus* (CDCl<sub>3</sub>, Bruker 400 MHz)
- S12. <sup>1</sup>H-<sup>1</sup>H COSY spectrum of variabilin (**3**) from *S. fasciculatus* (CDCl<sub>3</sub>, Bruker 400 MHz)

- S13. HSQC spectrum of variabilin (**3**) from *S. fasciculatus* (CDCl<sub>3</sub>, Bruker 400 MHz)
- S14. HMBC spectrum of variabilin (**3**) from *S. fasciculatus* (CDCl<sub>3</sub>, *J*= 10 Hz, Bruker 400 MHz)
- S15. ESI MS spectrum of variabilin (**3**) from *S. fasciculatus*
- S16. <sup>1</sup>H NMR spectrum of compound **4** from *S. spinosulus* (CDCl<sub>3</sub>, Bruker 300 MHz)
- S17. <sup>13</sup>C NMR spectrum of compound **4** from *S. spinosulus* (CDCl<sub>3</sub>, Bruker 300 MHz)
- S18. ESI MS spectrum of compound **4** from *S. spinosulus*
- S19. <sup>1</sup>H NMR spectrum of compound **5** from *S. spinosulus* (CDCl<sub>3</sub>, Bruker 400 MHz)
- S20. ESI MS spectrum of compound **5** from *S. spinosulus*
- S21. <sup>1</sup>H NMR spectrum of compound **6** from *S. foetidus* (CDCl<sub>3</sub>, Bruker 400 MHz)
- S22. HSQC spectrum of compound **6** from *S. foetidus* (CDCl<sub>3</sub>, Bruker 400 MHz)
- S23. ESI MS spectrum of compound **6** from *S. foetidus* sponge

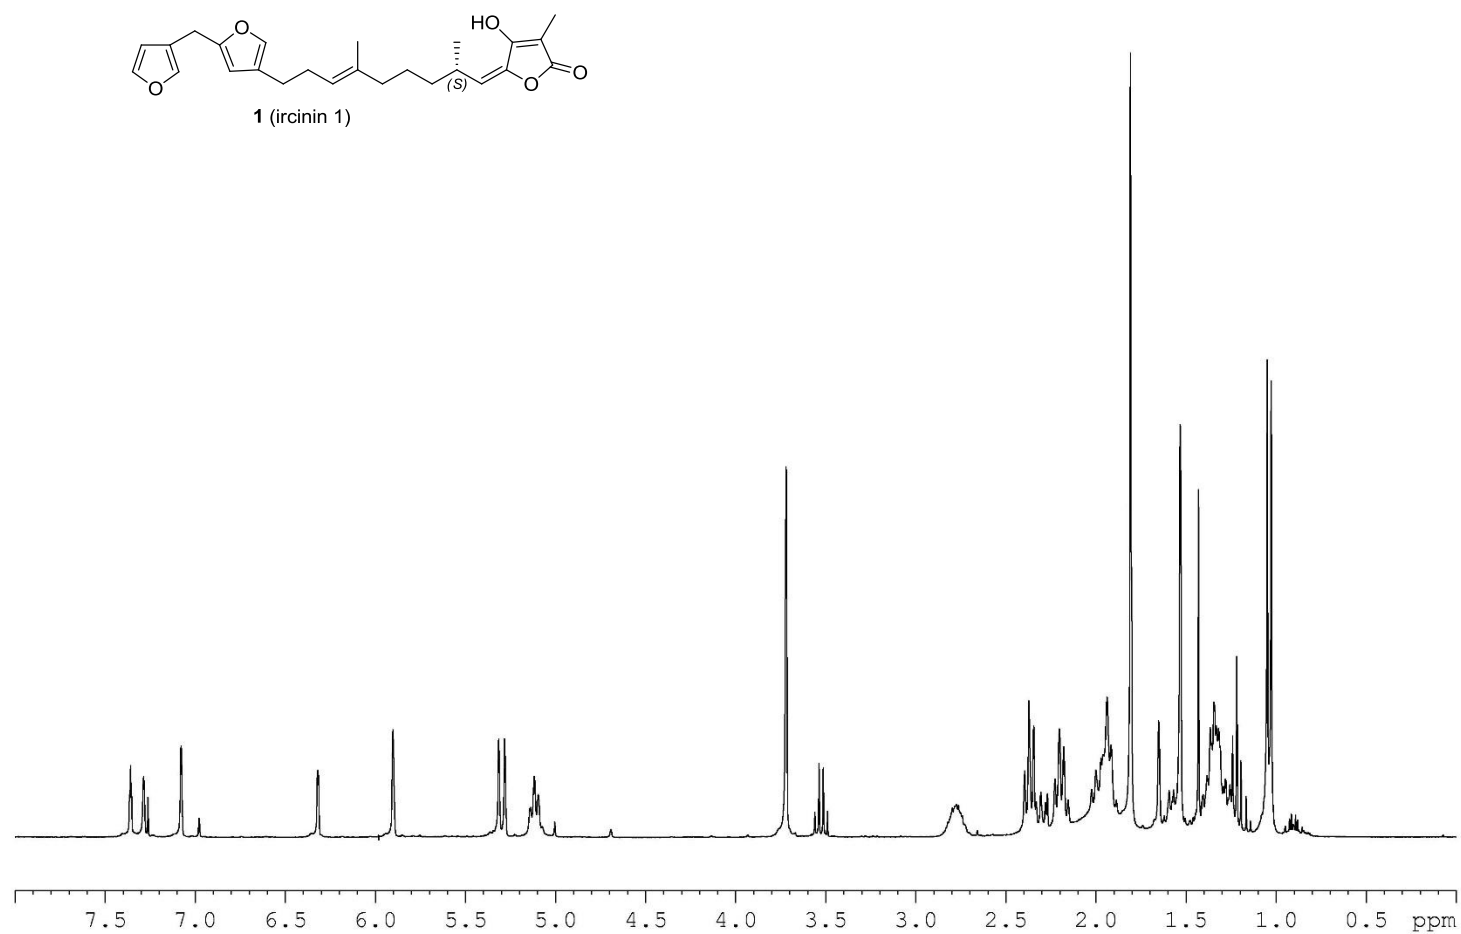

<sup>1</sup>H NMR spectrum of ircinin (**1**) from *S. spinosulus* (CDCl<sub>3</sub>, Bruker 400 MHz)

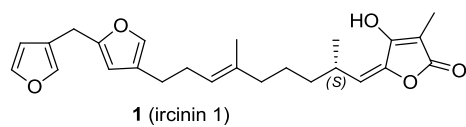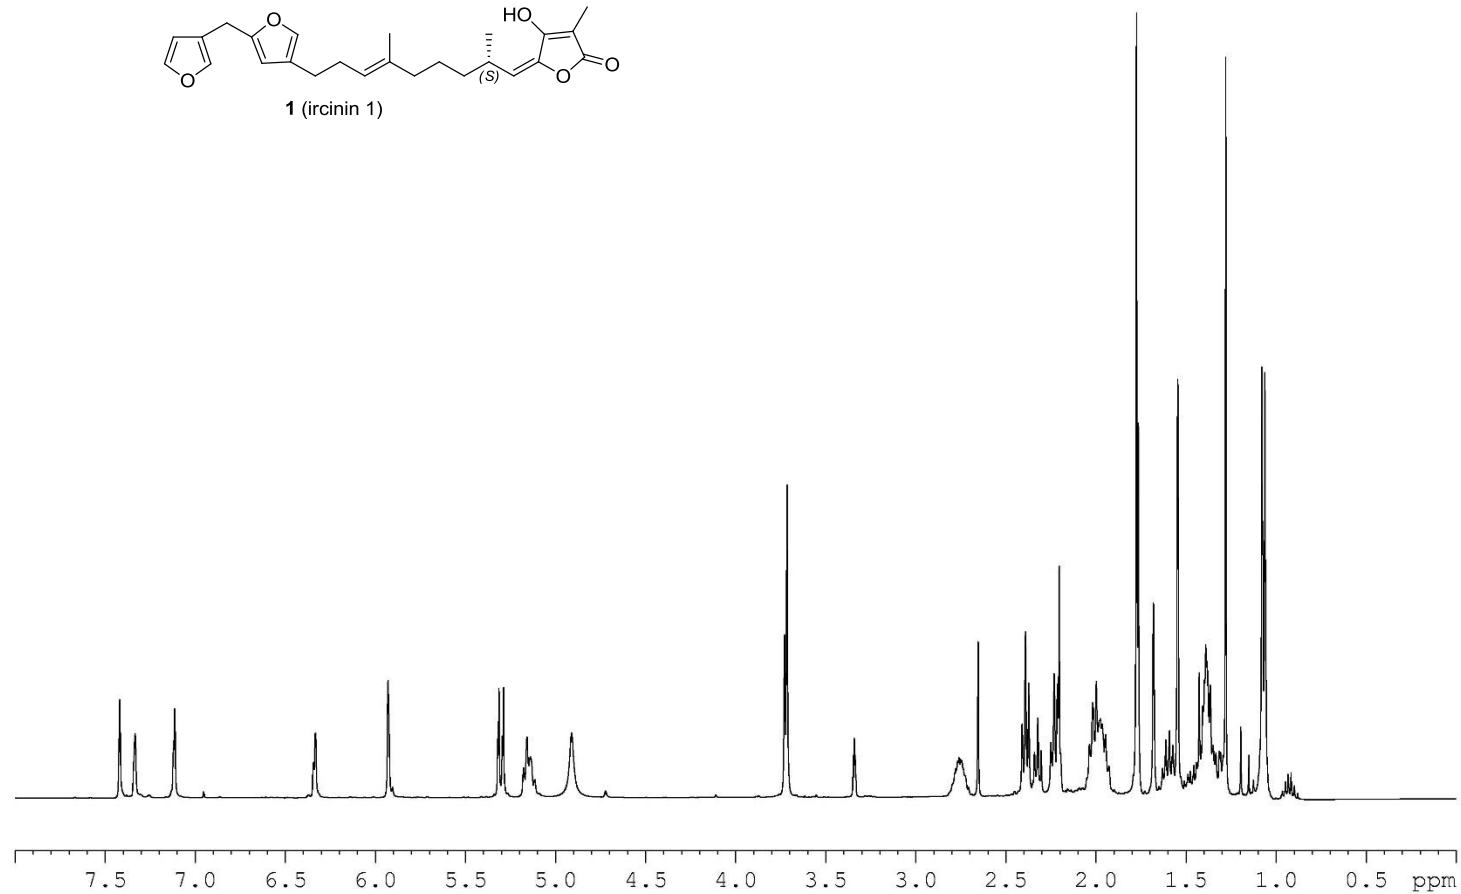

$^1\text{H}$  NMR spectrum of ircinin (**1**) from *S. spinosulus* ( $\text{CD}_3\text{OD}$ , Bruker 600 MHz)

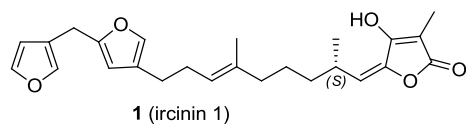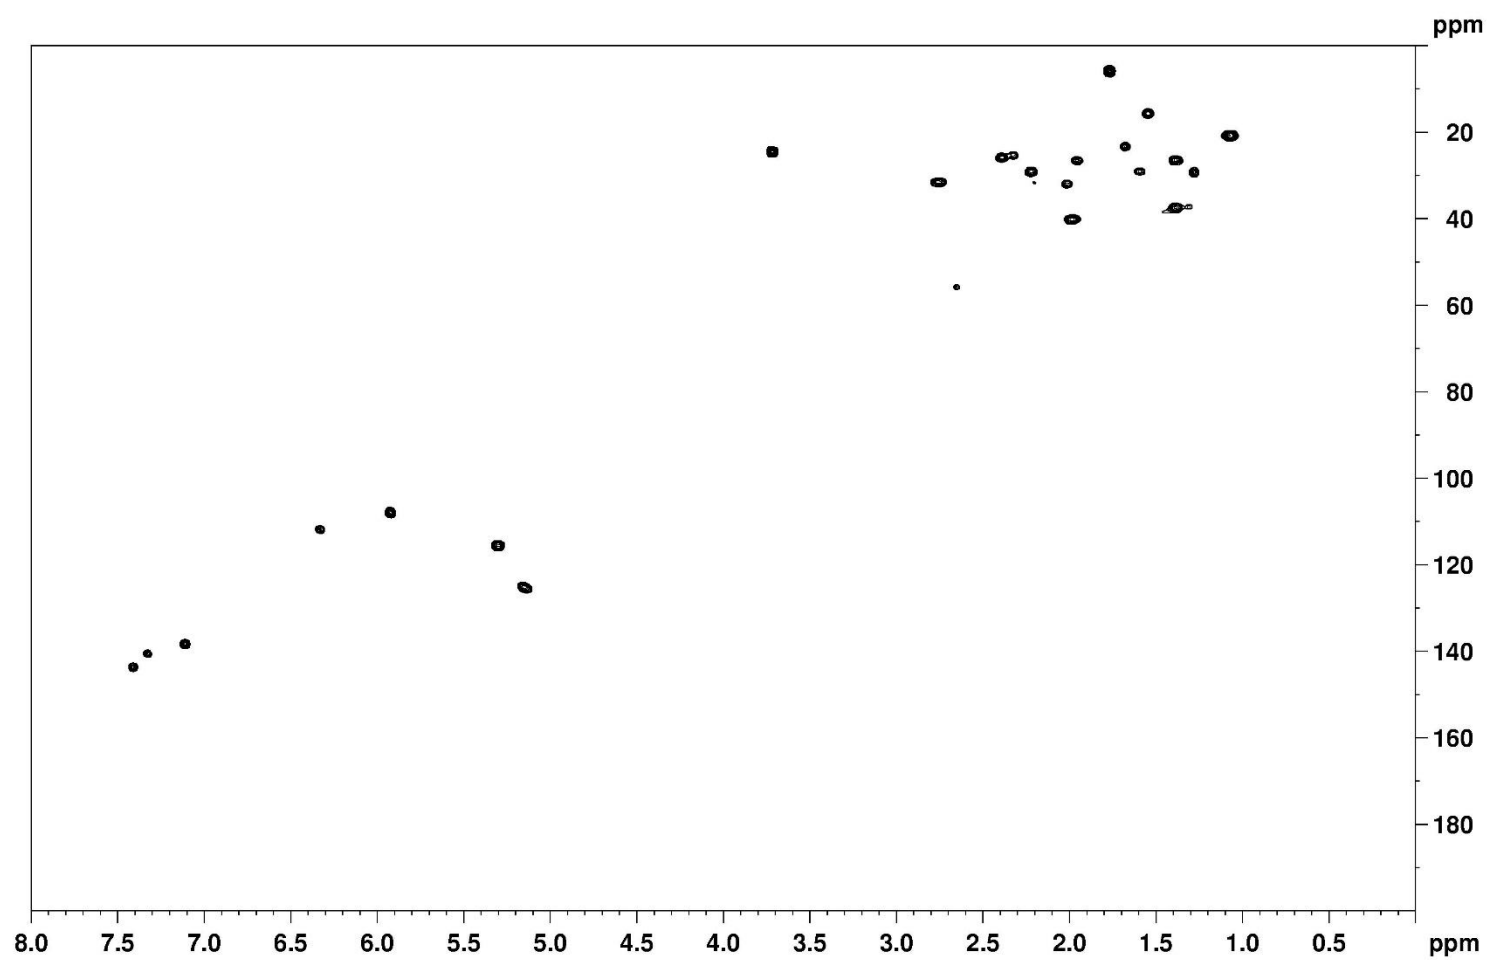

HSQC spectrum of ircinin (**1**) from *S. spinosulus* (CD<sub>3</sub>OD, Bruker 600 MHz)

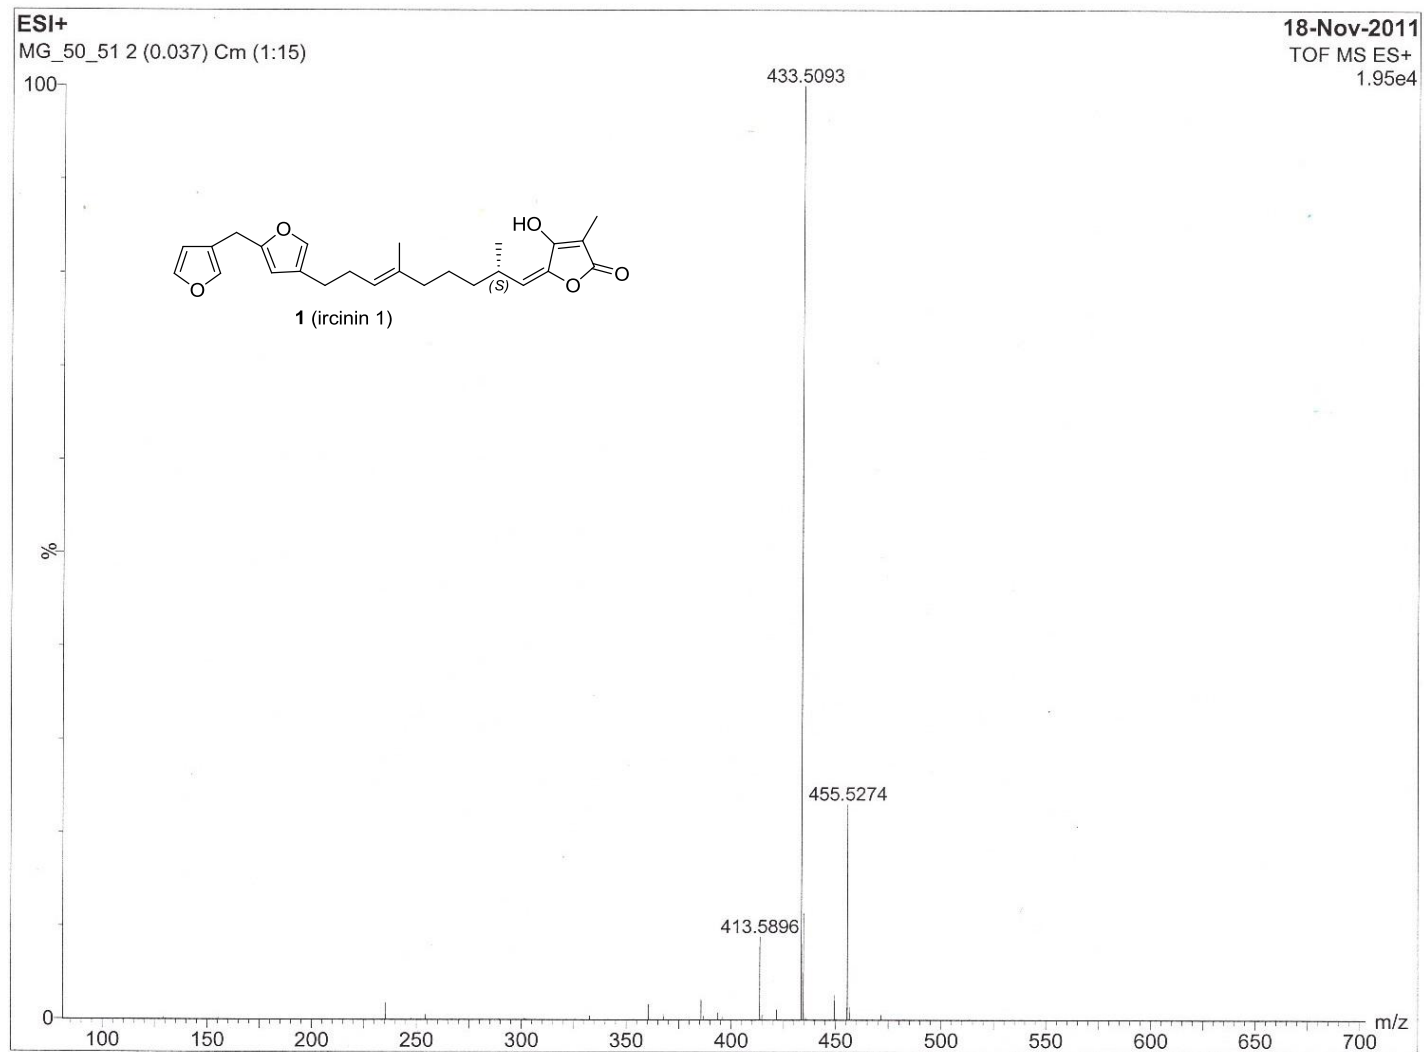ESI MS spectrum of ircinin (**1**) from *S. spinosulus*

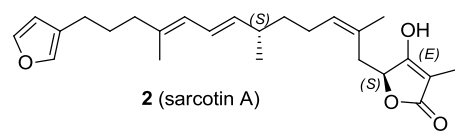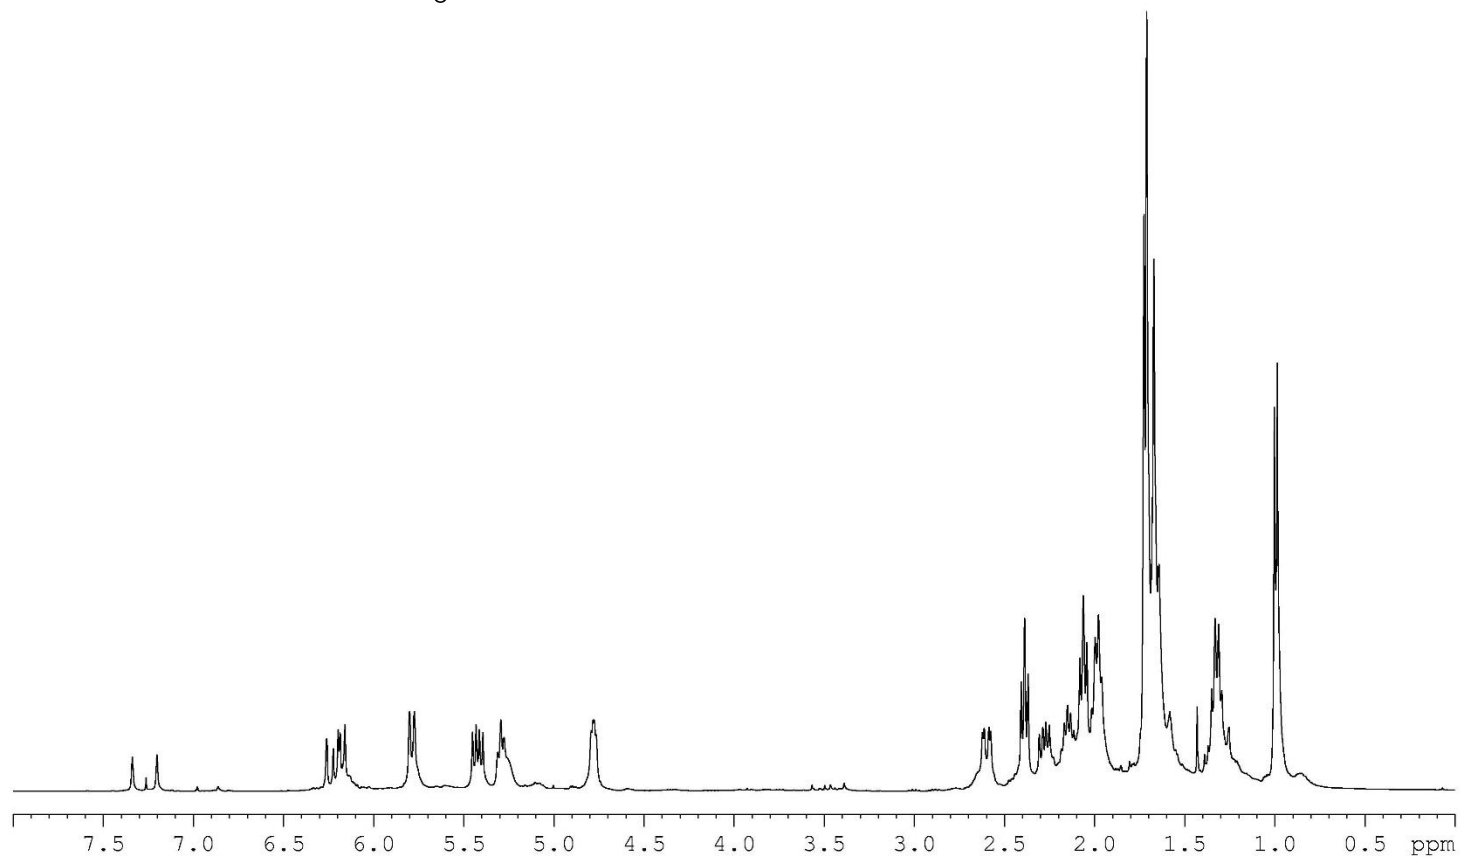

$^1\text{H}$  NMR spectrum of sarcotinin A (**2**) from *S. fasciculatus* ( $\text{CDCl}_3$ , Bruker 400 MHz)

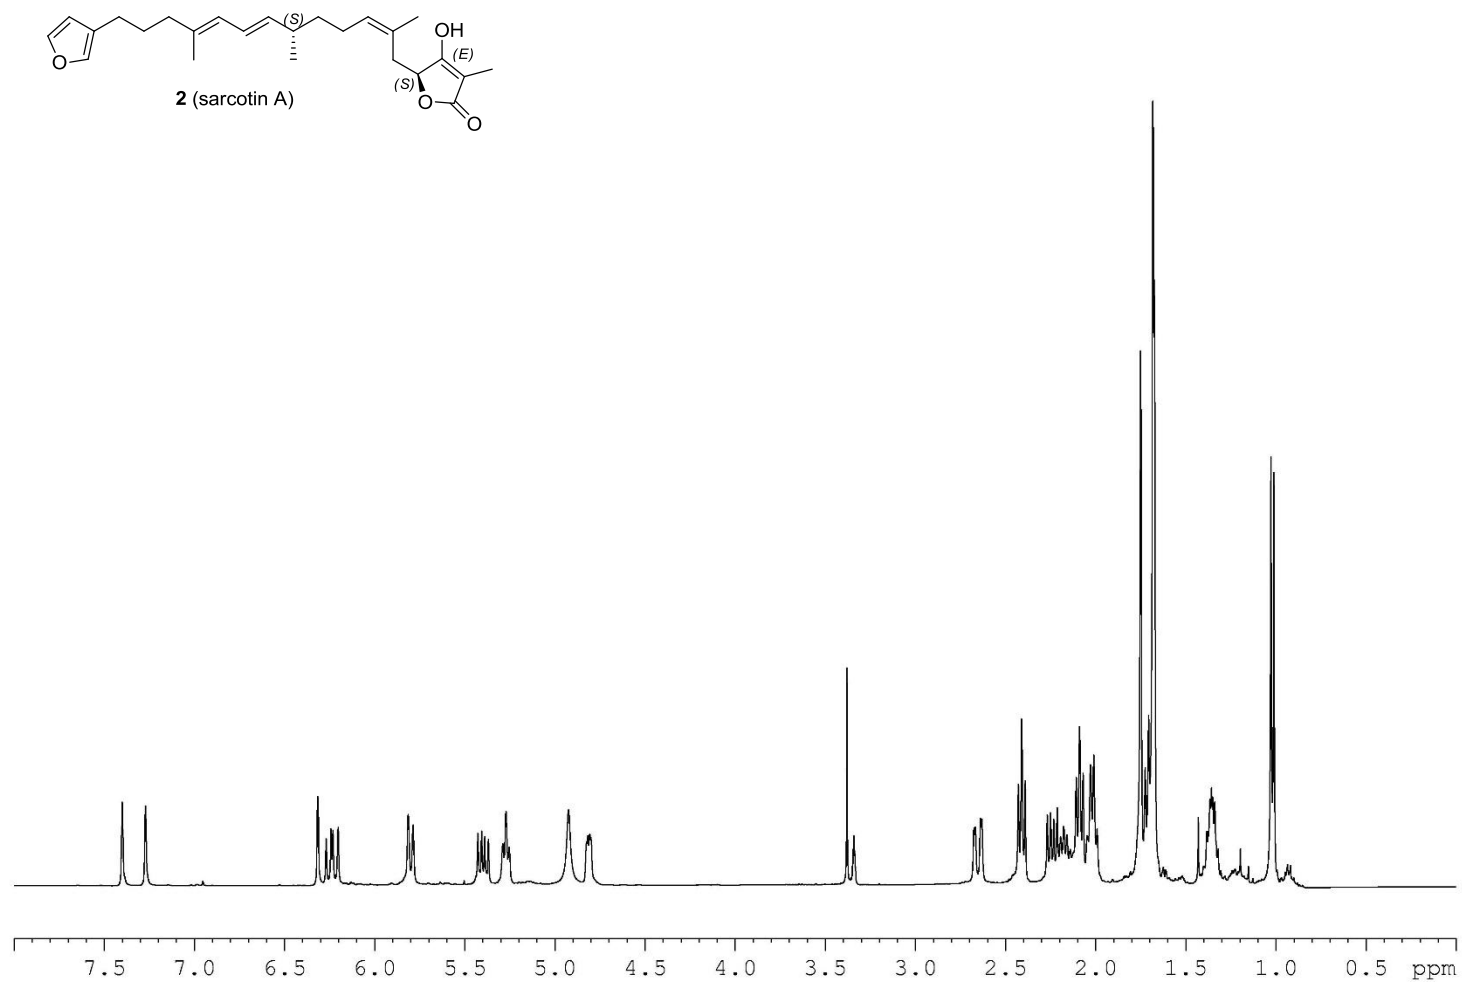

<sup>1</sup>H NMR spectrum of sarcotin A (**2**) from *S. fasciculatus* (CD<sub>3</sub>OD, Bruker 400 MHz)



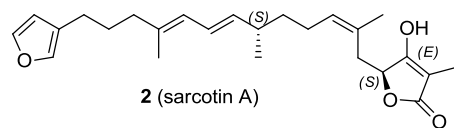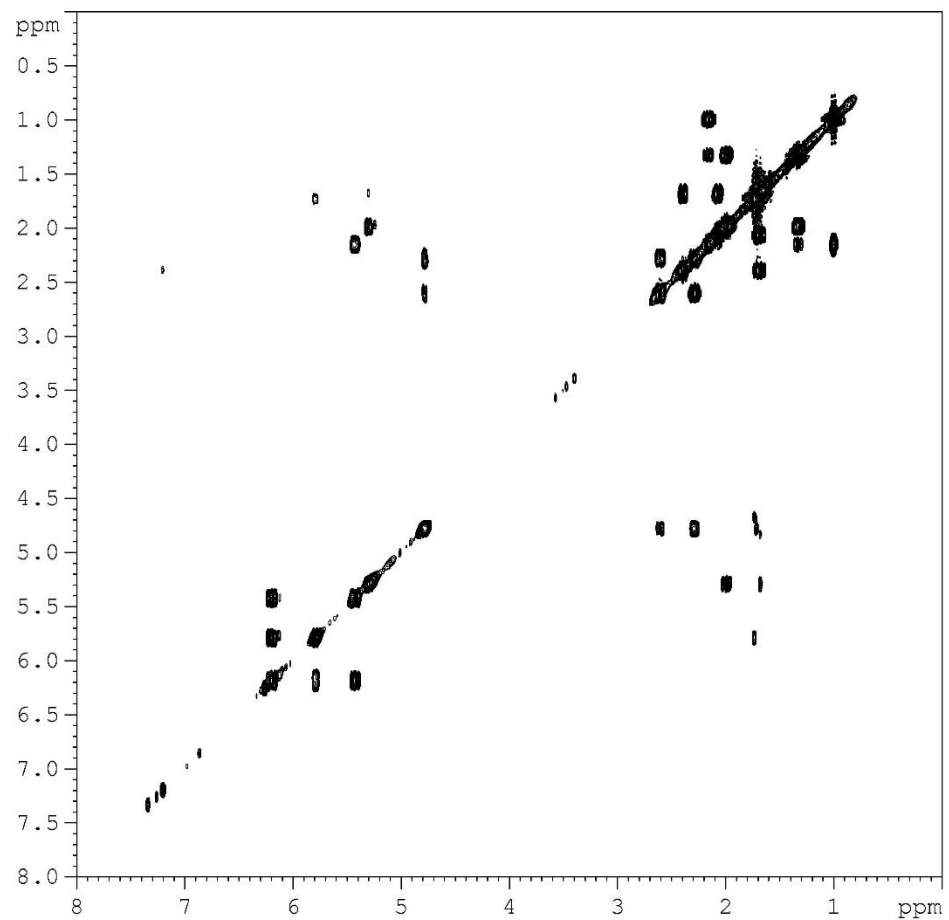

$^1\text{H}$ - $^1\text{H}$  COSY spectrum of sarcotinin A (**2**) from *S. fasciculatus* ( $\text{CDCl}_3$ , Bruker 400 MHz)

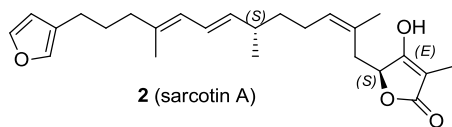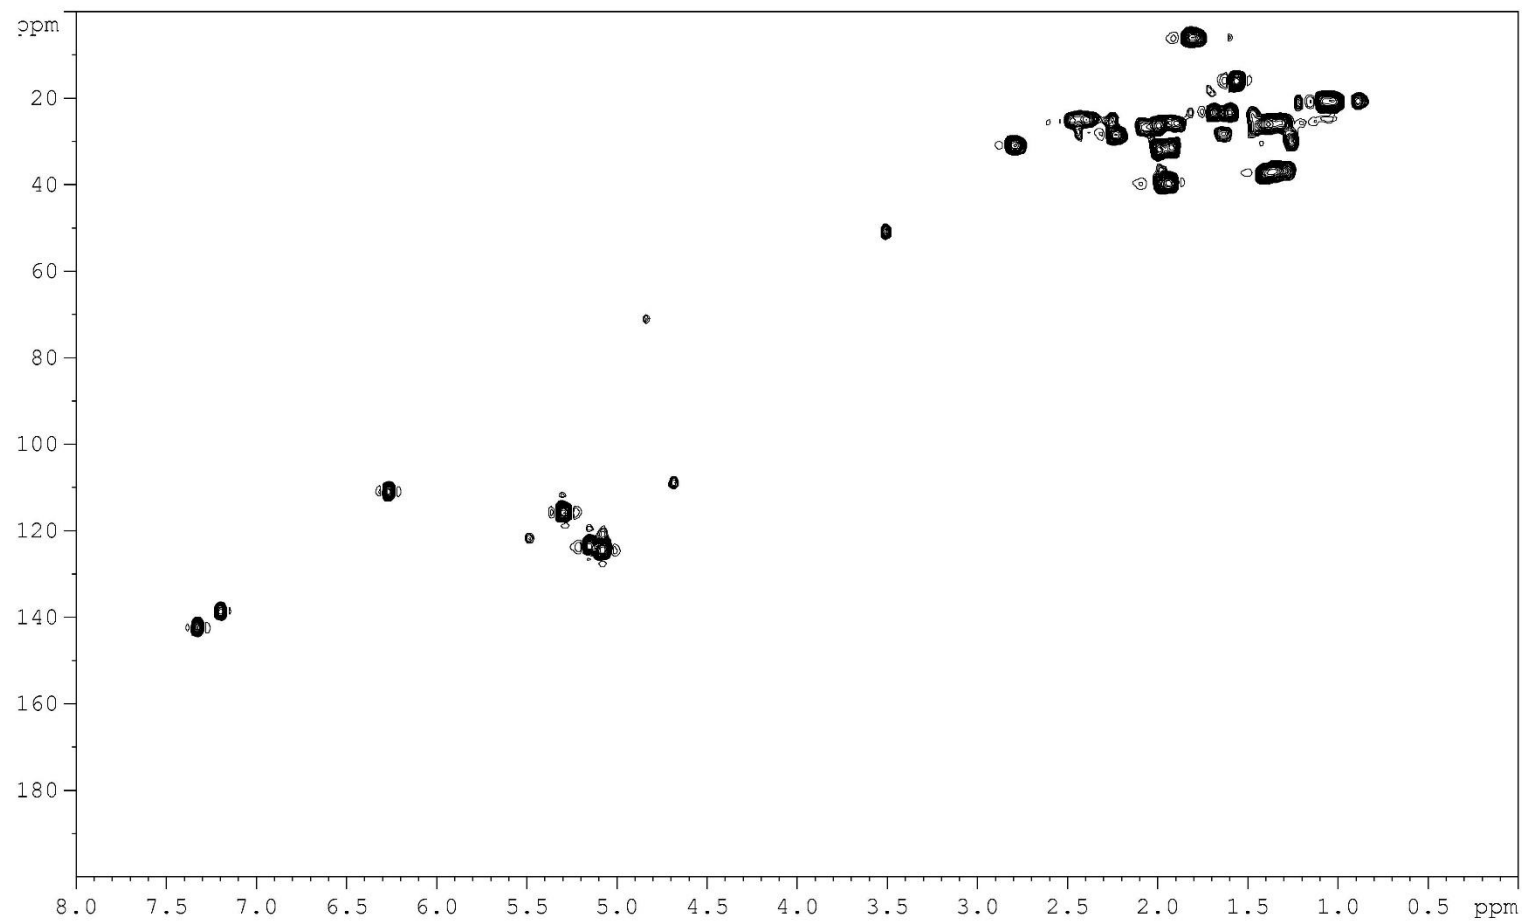

HSQC spectrum of sarcotinin A (**2**) from *S. fasciculatus* (CDCl<sub>3</sub>, Bruker 400 MHz)

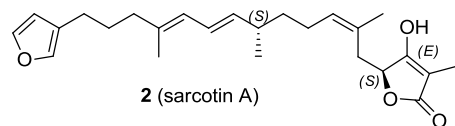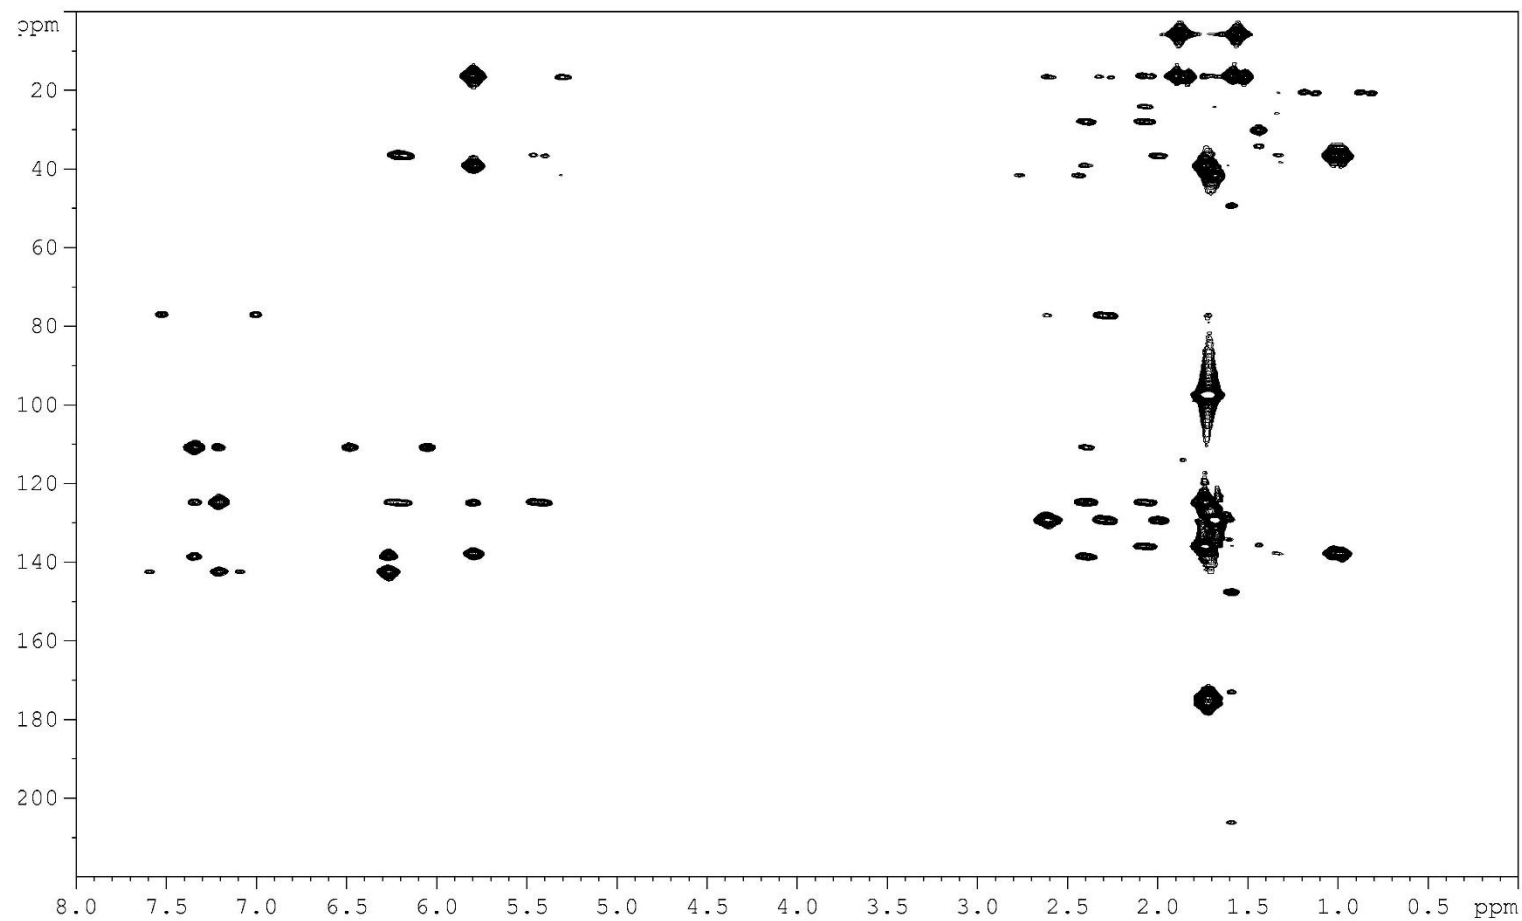

HMBC spectrum of sarcotin A (**2**) from *S. fasciculatus* (CDCl<sub>3</sub>, *J* = 10Hz, Bruker 400 MHz)

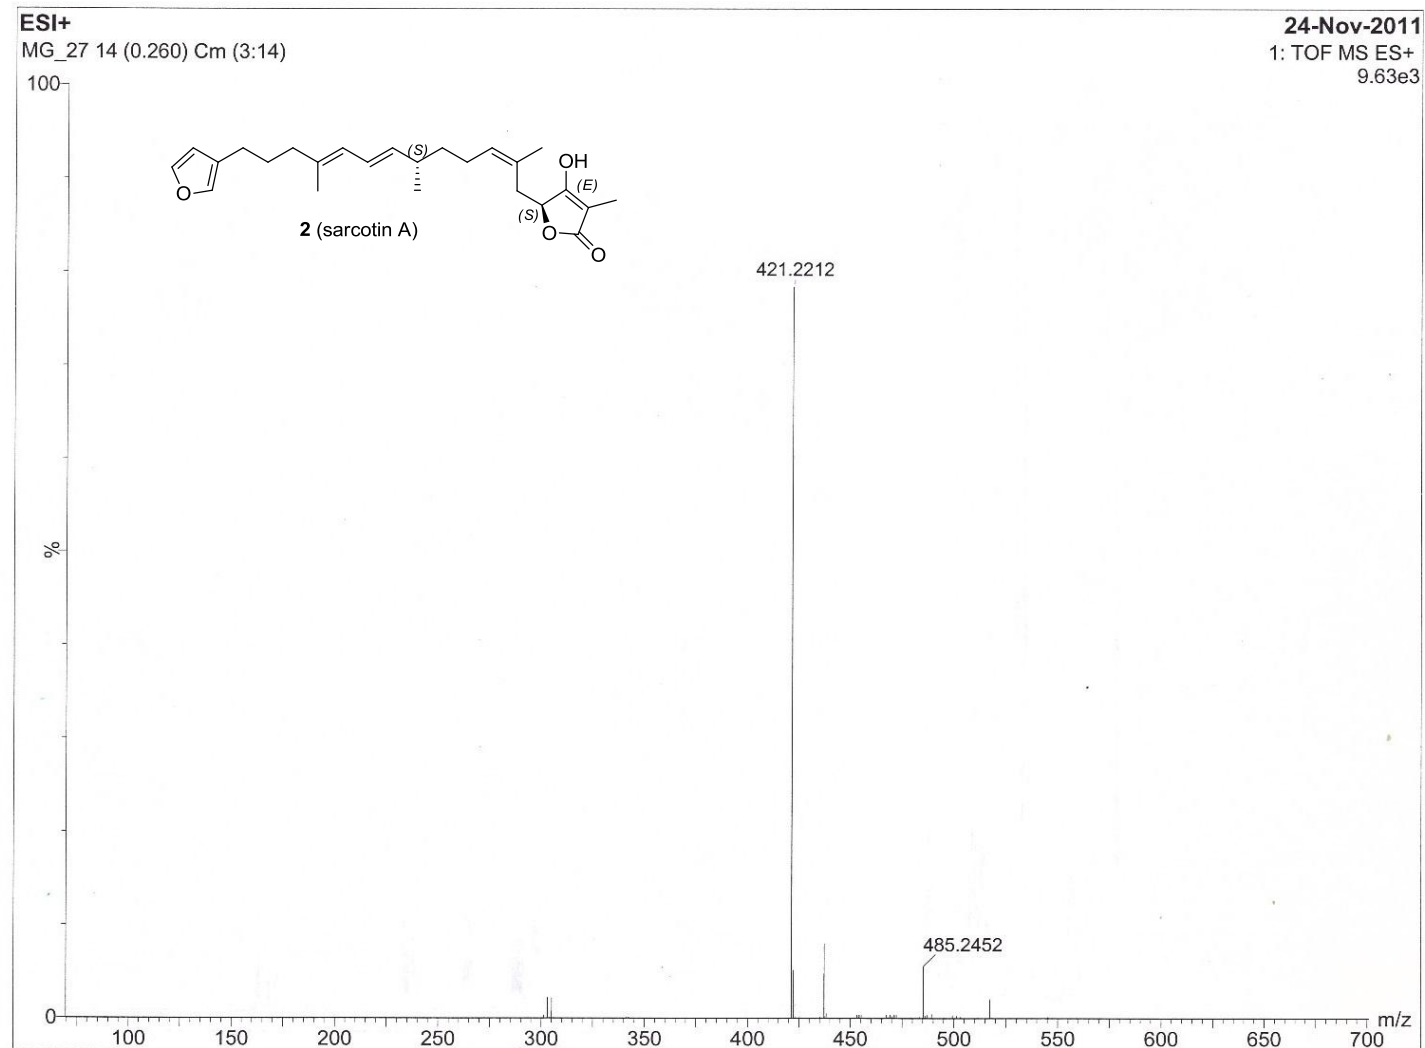ESI-MS spectrum of sarcotin A (**2**) from *S. fasciculatus*

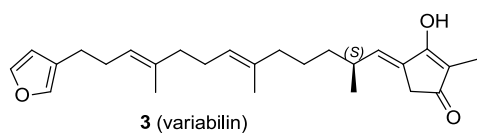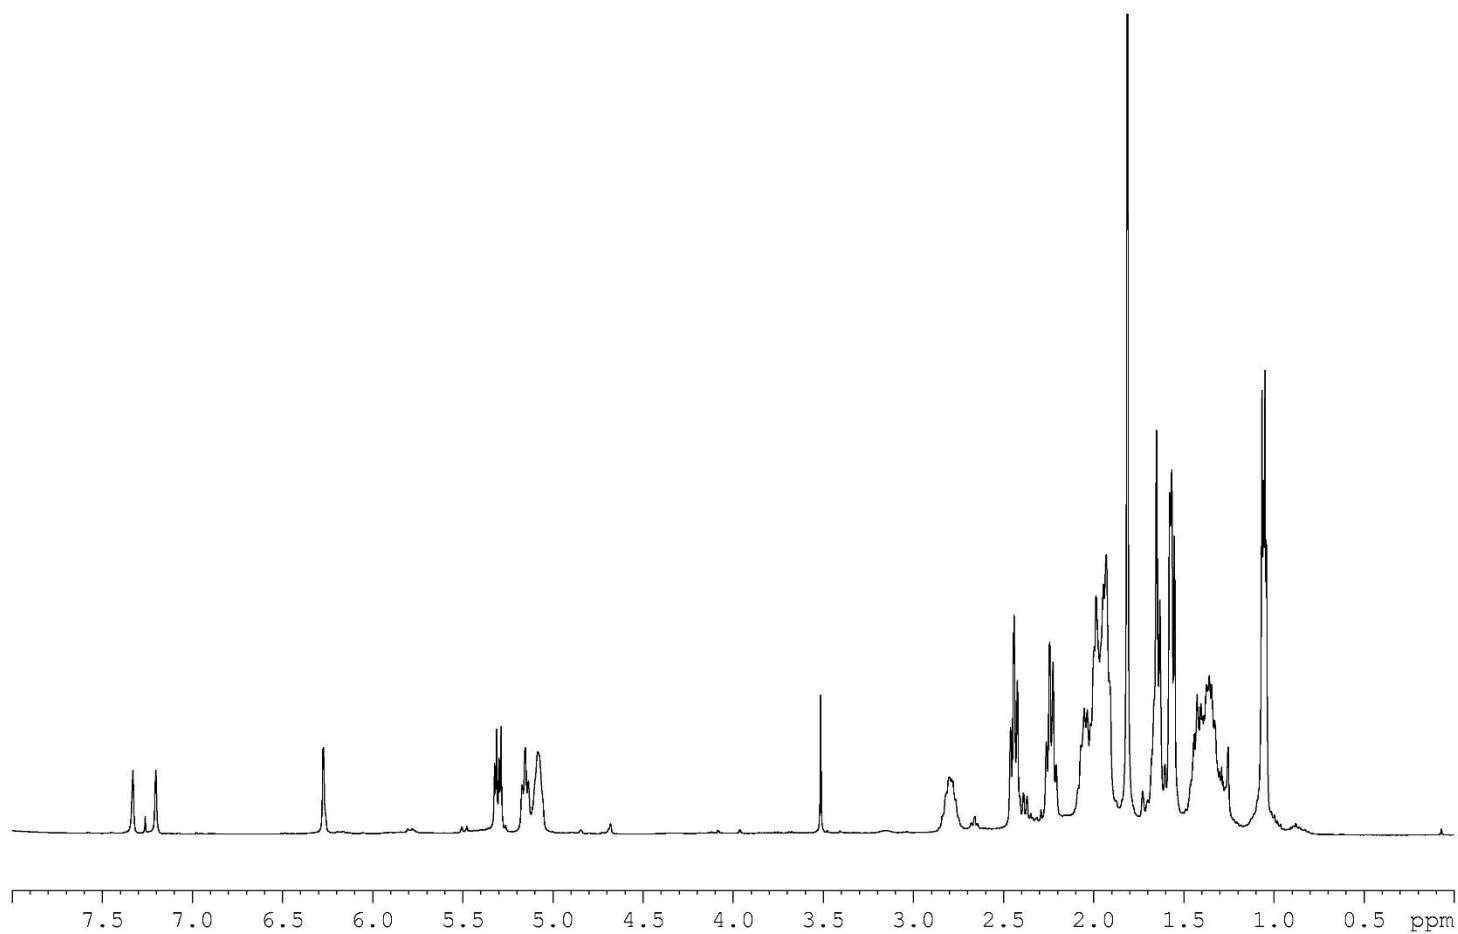

<sup>1</sup>H NMR spectrum of variabilin (**3**) from *S. fasciculatus* (CDCl<sub>3</sub>, Bruker 400 MHz)

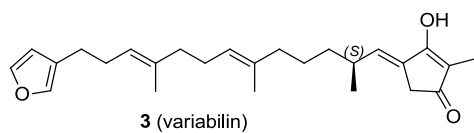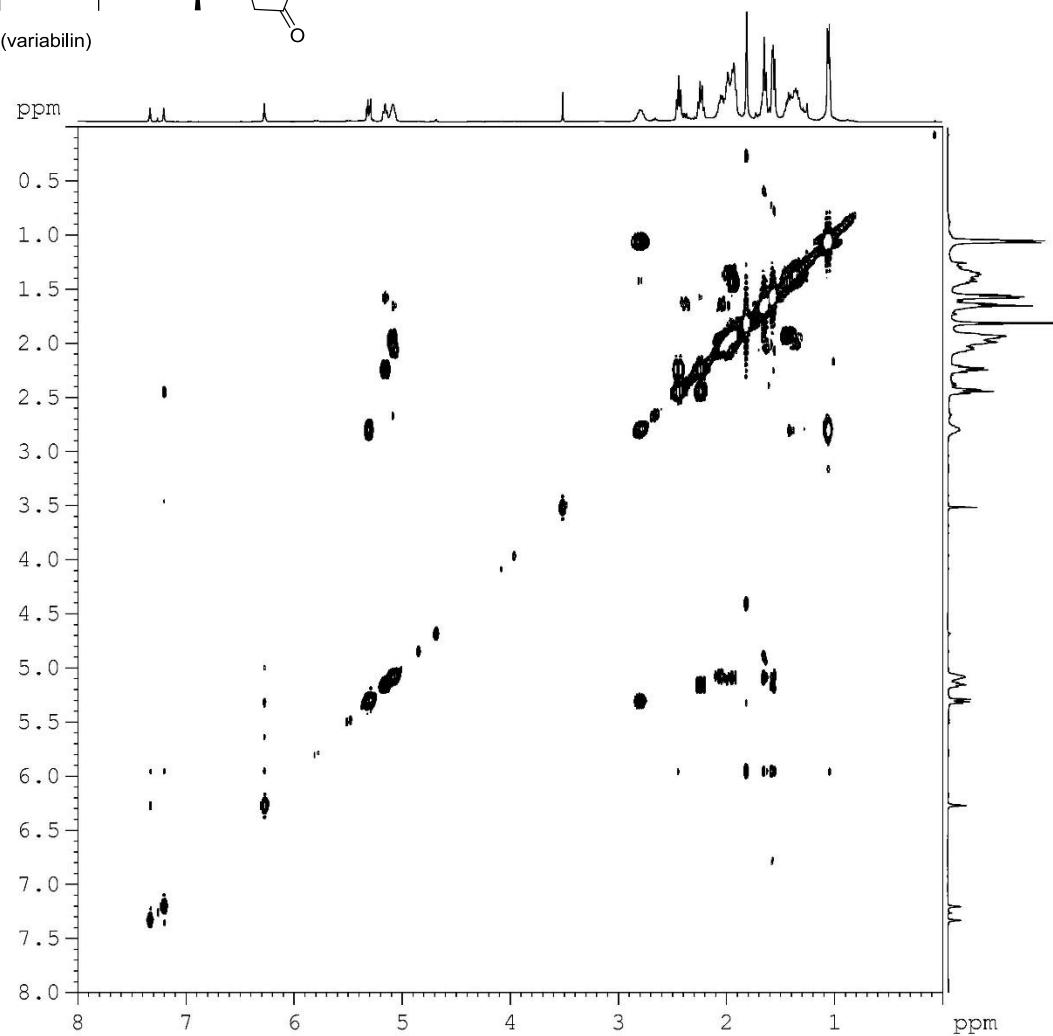

$^1\text{H}$ - $^1\text{H}$  COSY spectrum of variabilin (**3**) from *S. fasciculatus* ( $\text{CDCl}_3$ , Bruker 400 MHz)

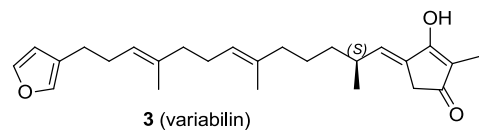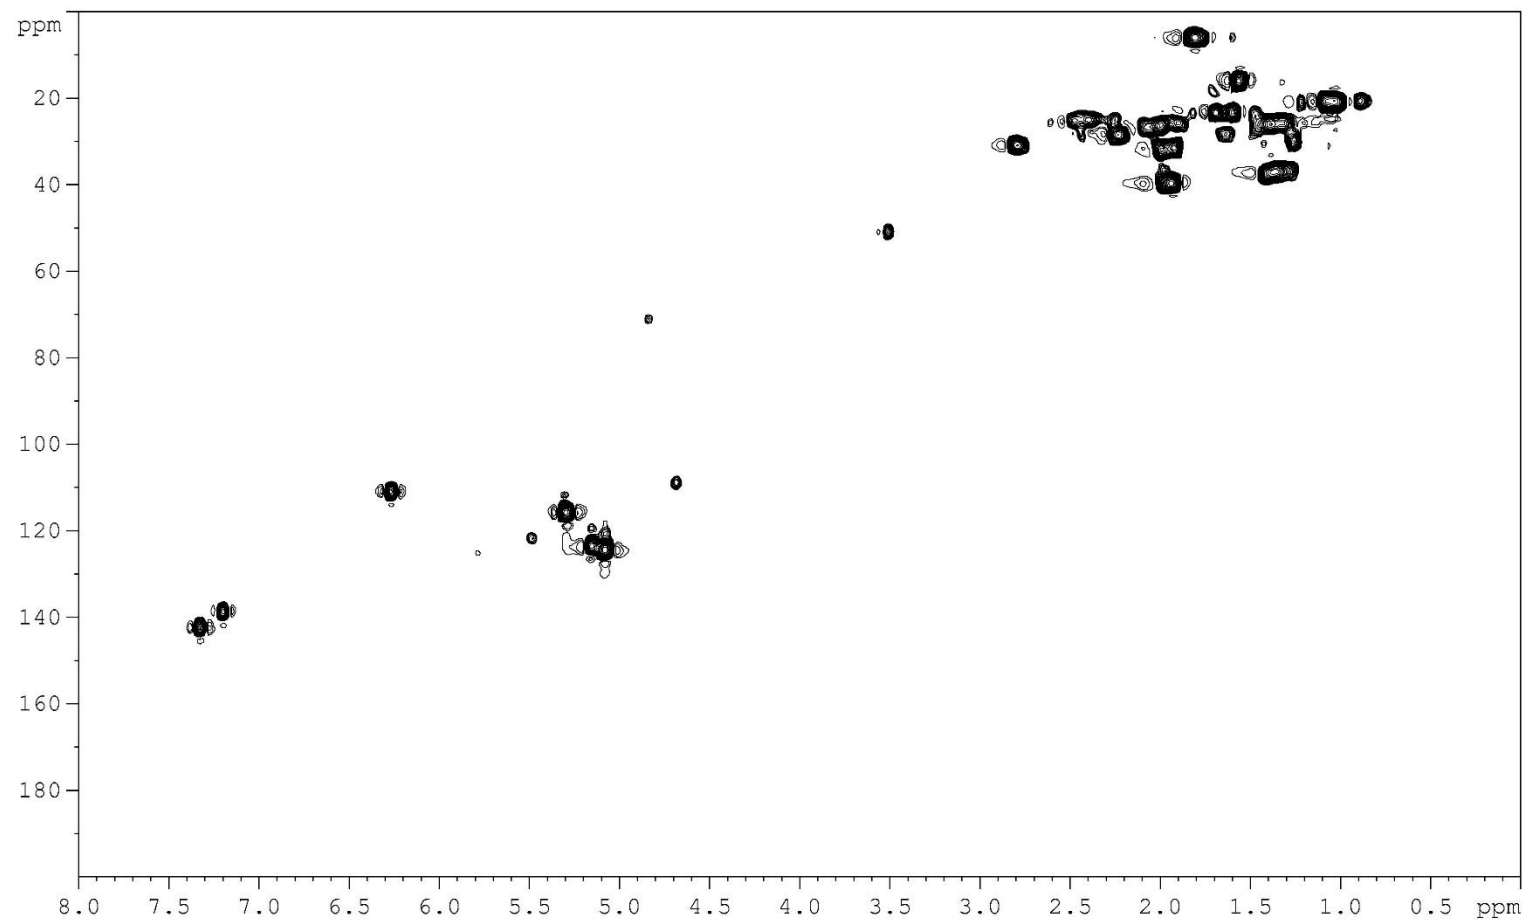

HSQC spectrum of variabilin (**3**) from *S. fasciculatus* (CDCl<sub>3</sub>, Bruker 400 MHz)

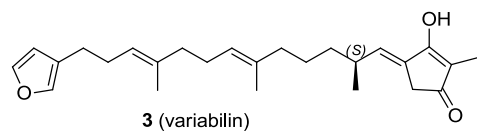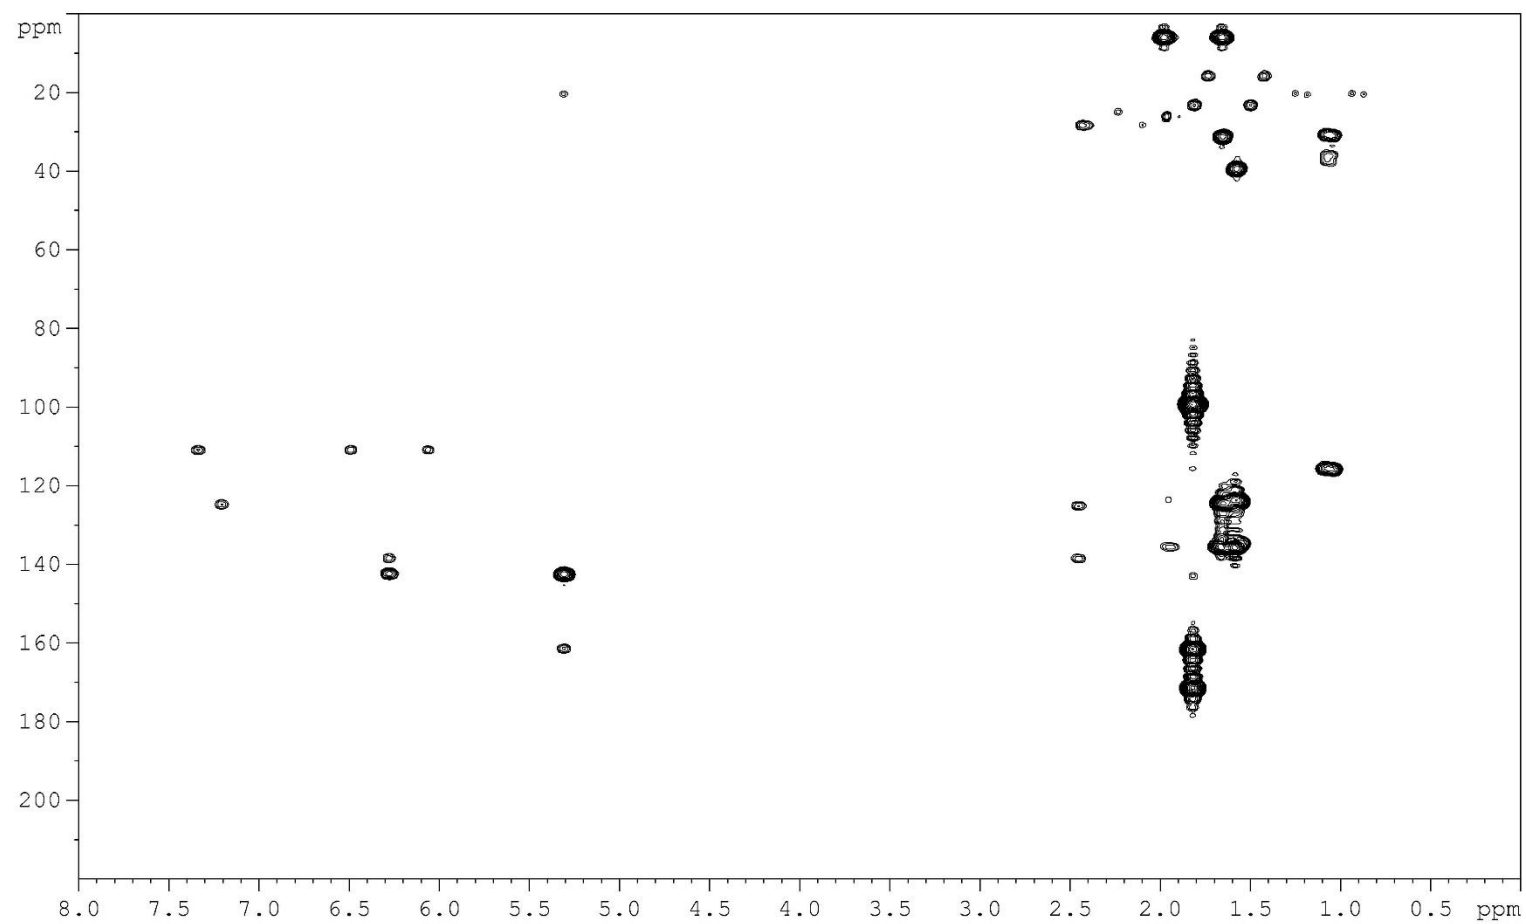

HMBC spectrum of variabilin (**3**) from *S. fasciculatus* (CDCl<sub>3</sub>,  $J = 10$  Hz) Bruker 400 MHz)



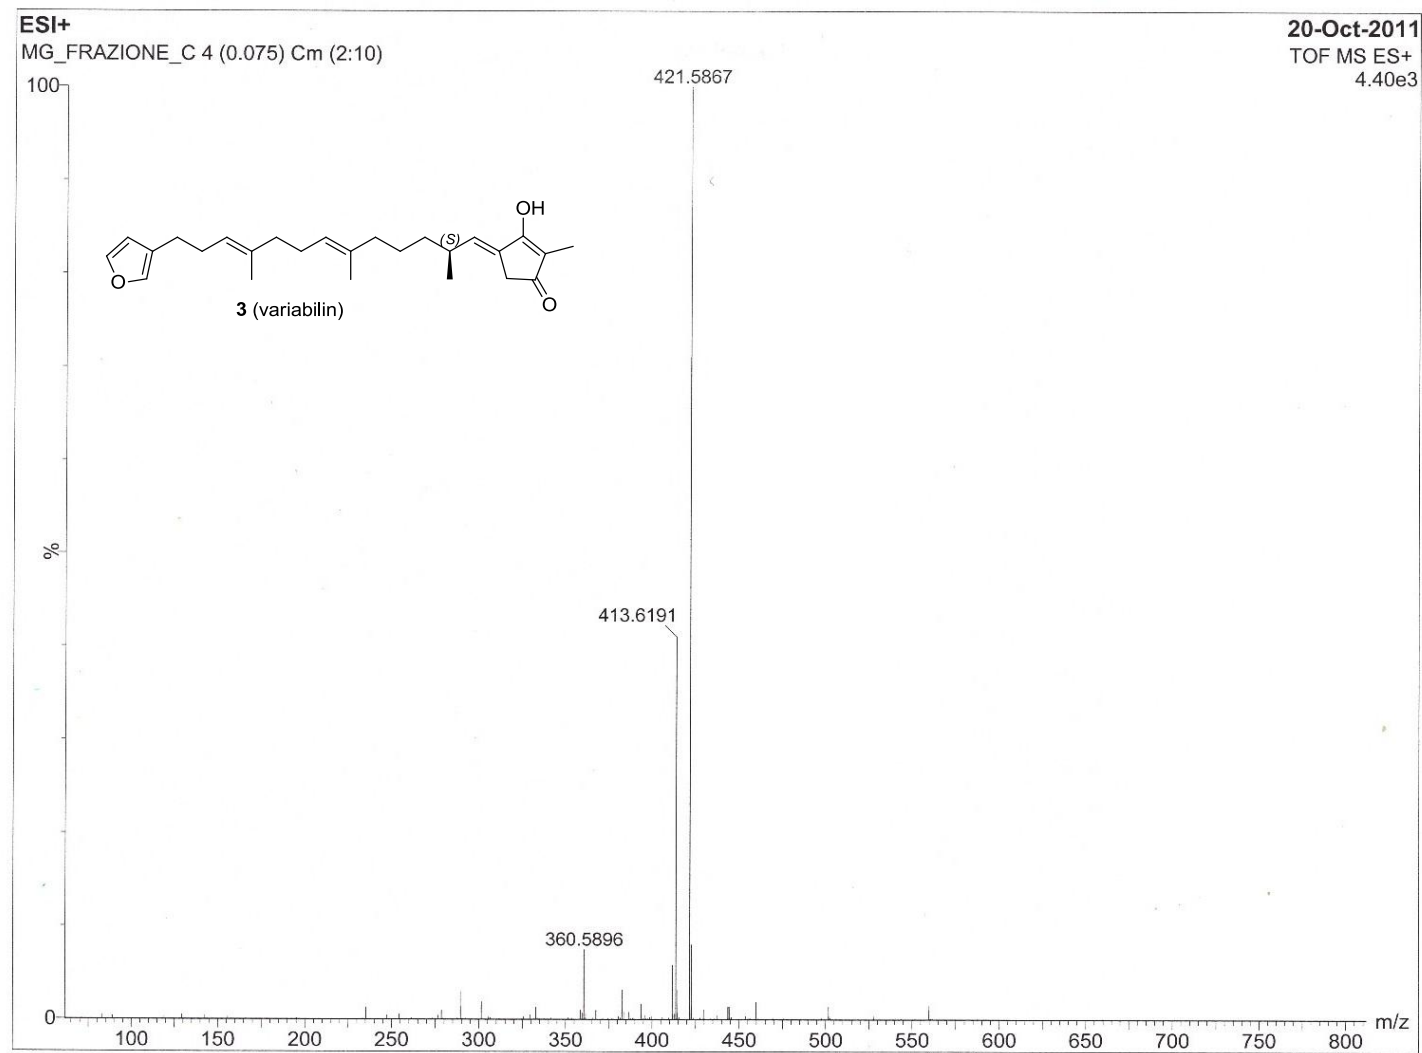ESI MS spectrum of variabilin (**3**) from *S. fasciculatus*

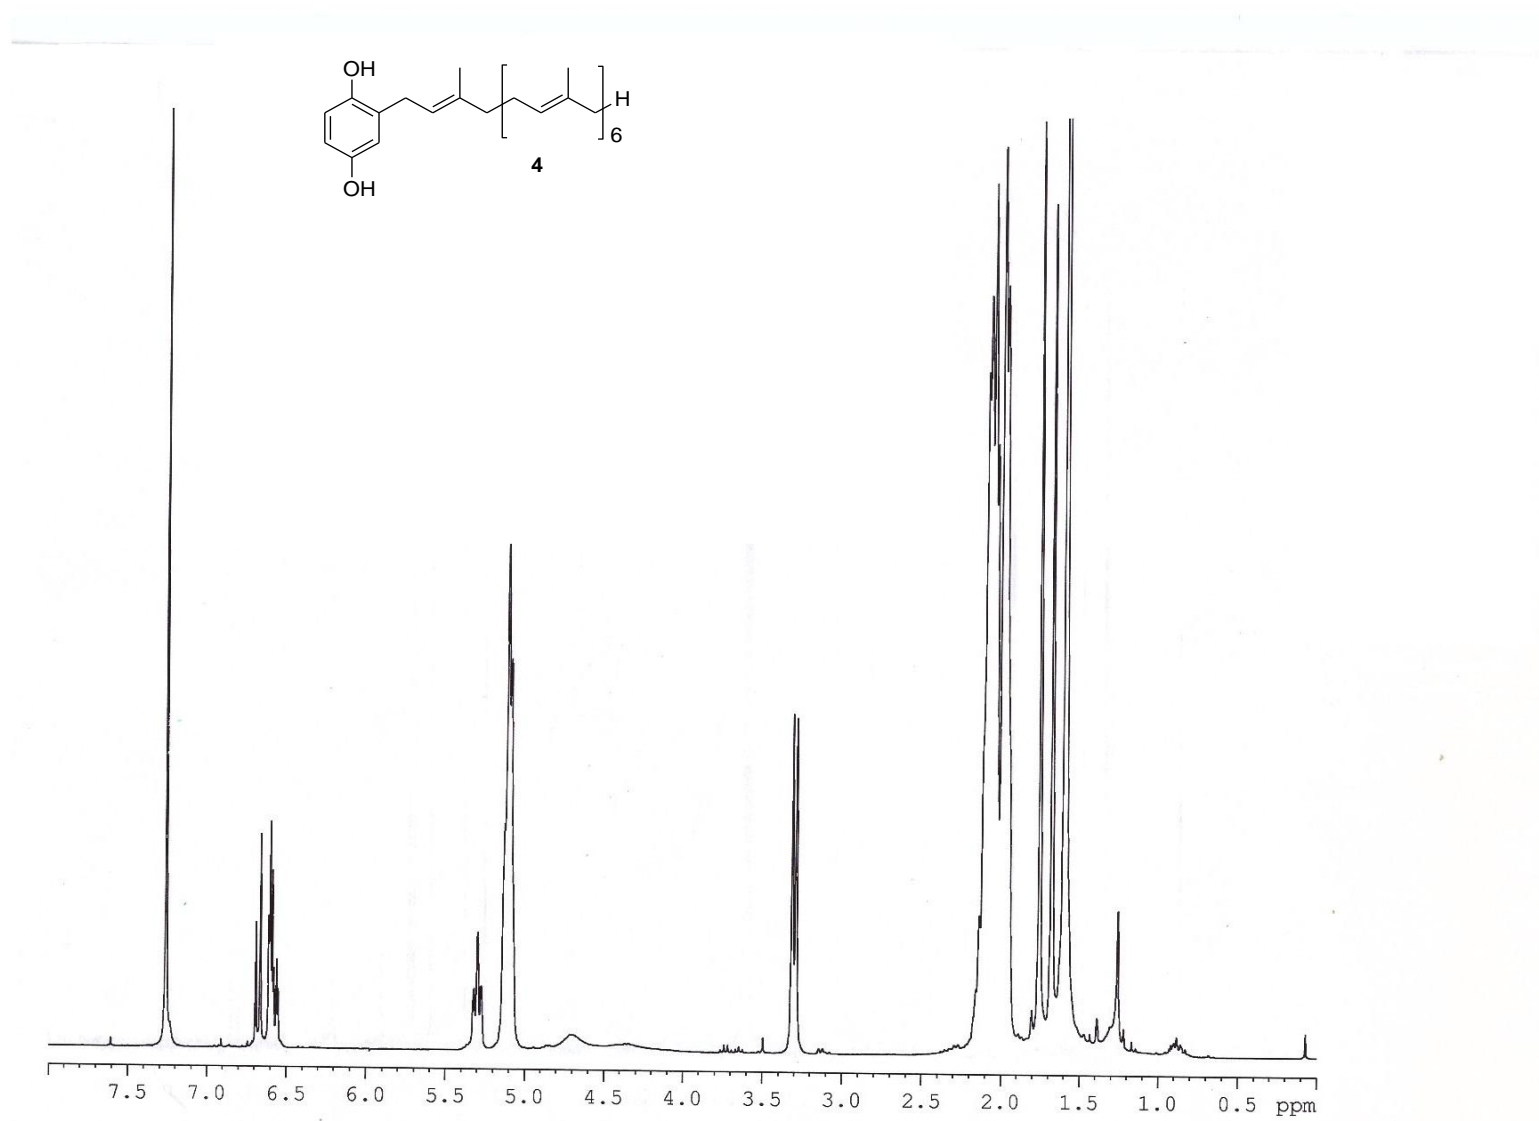

$^1\text{H}$  NMR spectrum of compound **4** from *S. spinosulus* (CDCl<sub>3</sub>, Bruker 300 MHz)

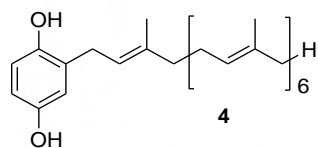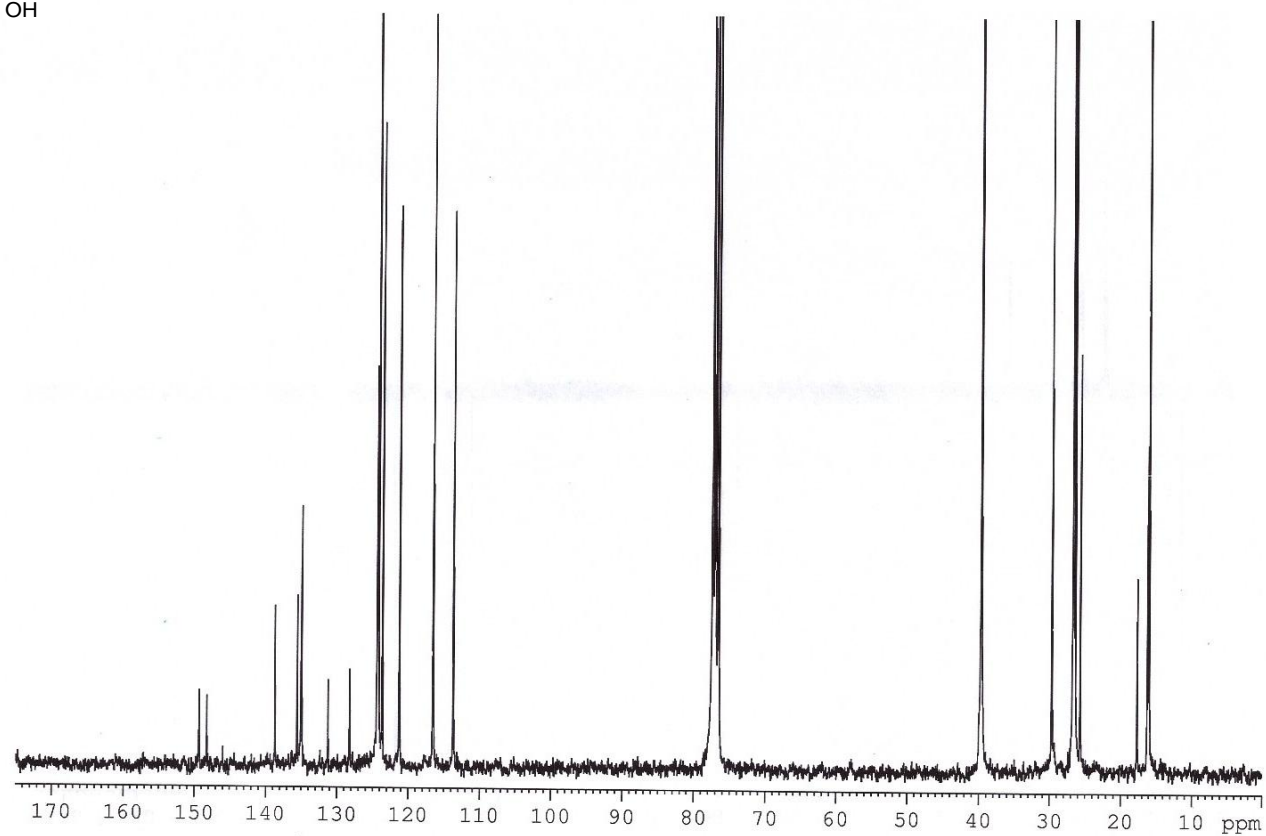

$^{13}\text{C}$  NMR spectrum of compound **4** from *S. spinosulus* (CDCl<sub>3</sub>, Bruker 300 MHz)

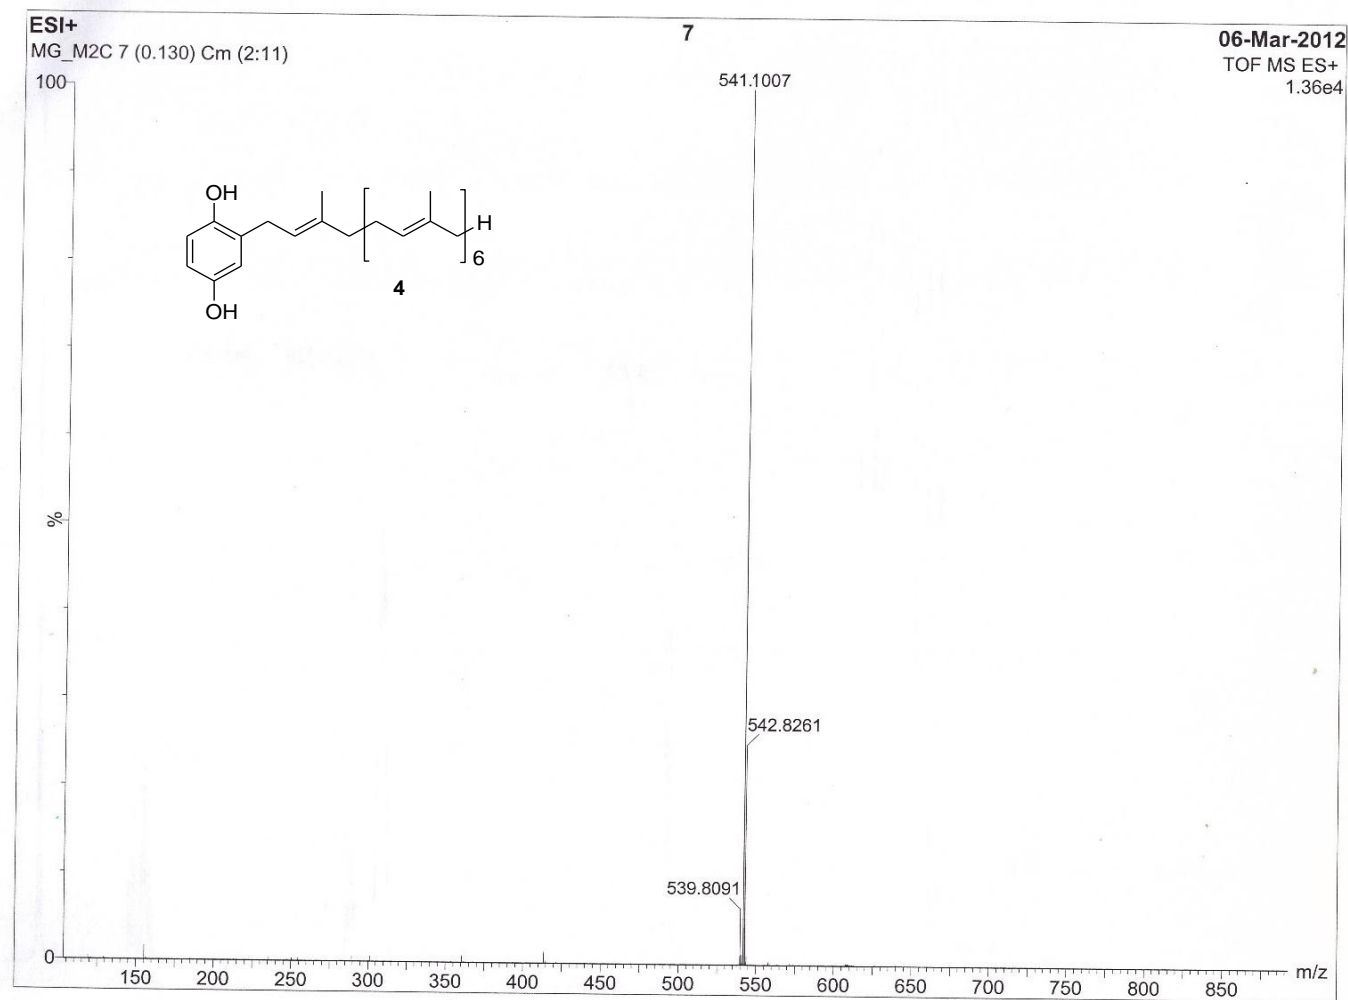ESI MS spectrum of compound **4** from *S. spinosulus*

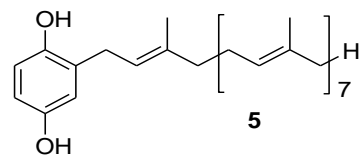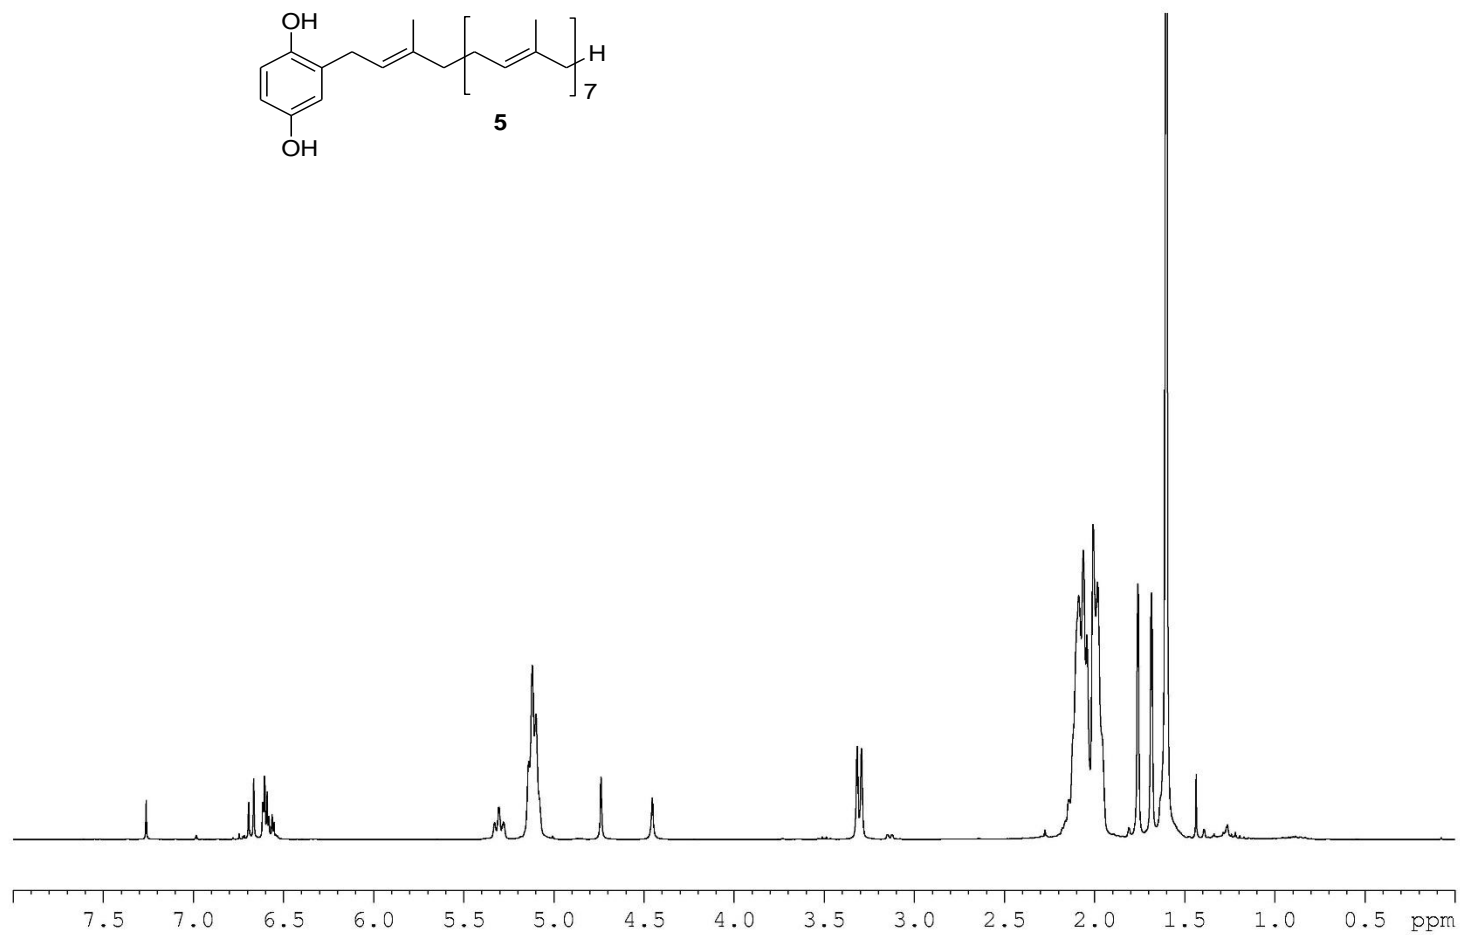

$^1\text{H}$  NMR spectrum of compound **5** from *S. spinosulus* ( $\text{CDCl}_3$ , Bruker 400 MHz)

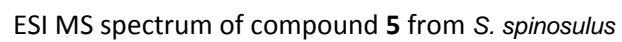

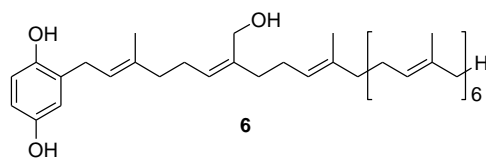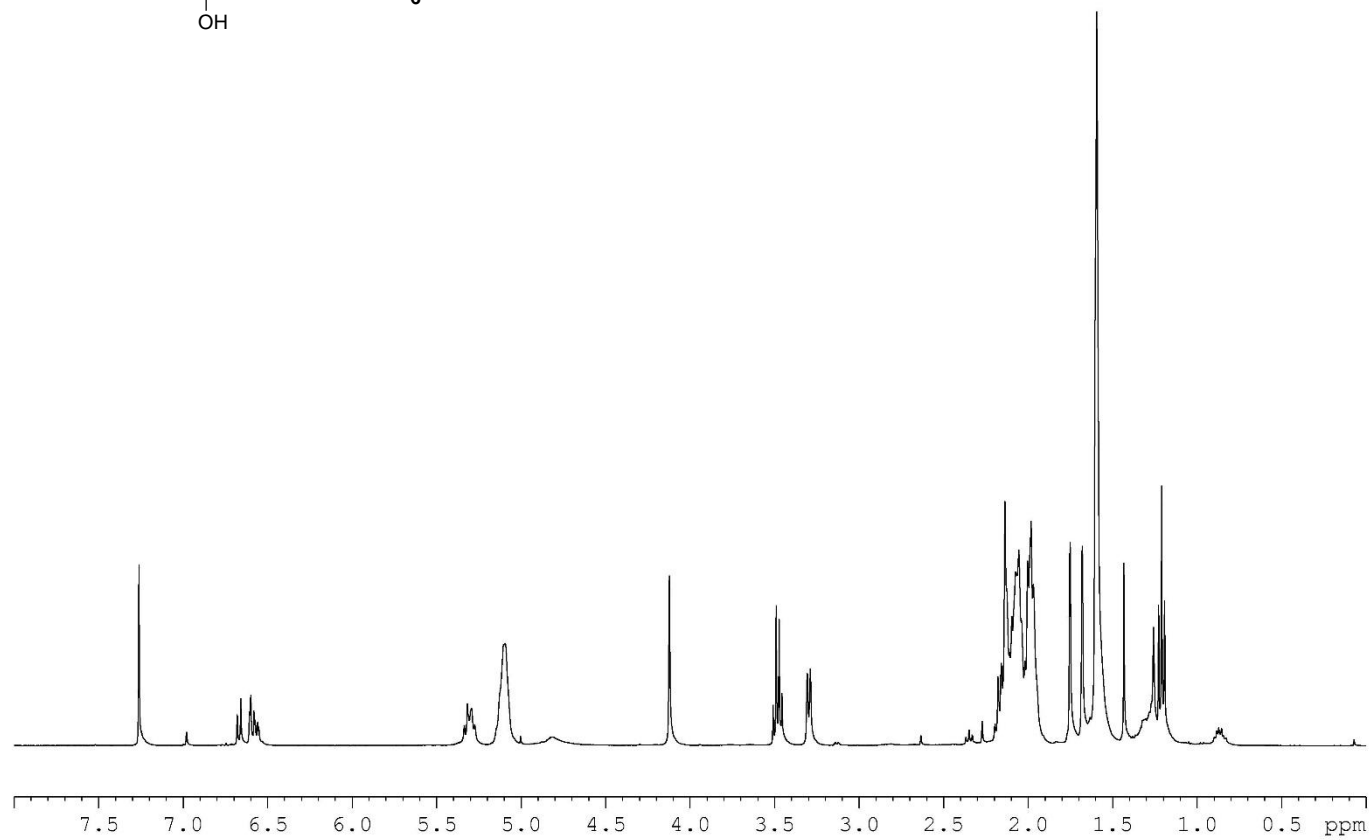

<sup>1</sup>H NMR spectrum of compound **6** from *S. foetidus* (CDCl<sub>3</sub>, Bruker 400 MHz)

S22

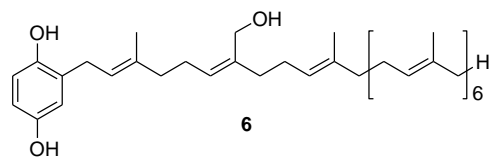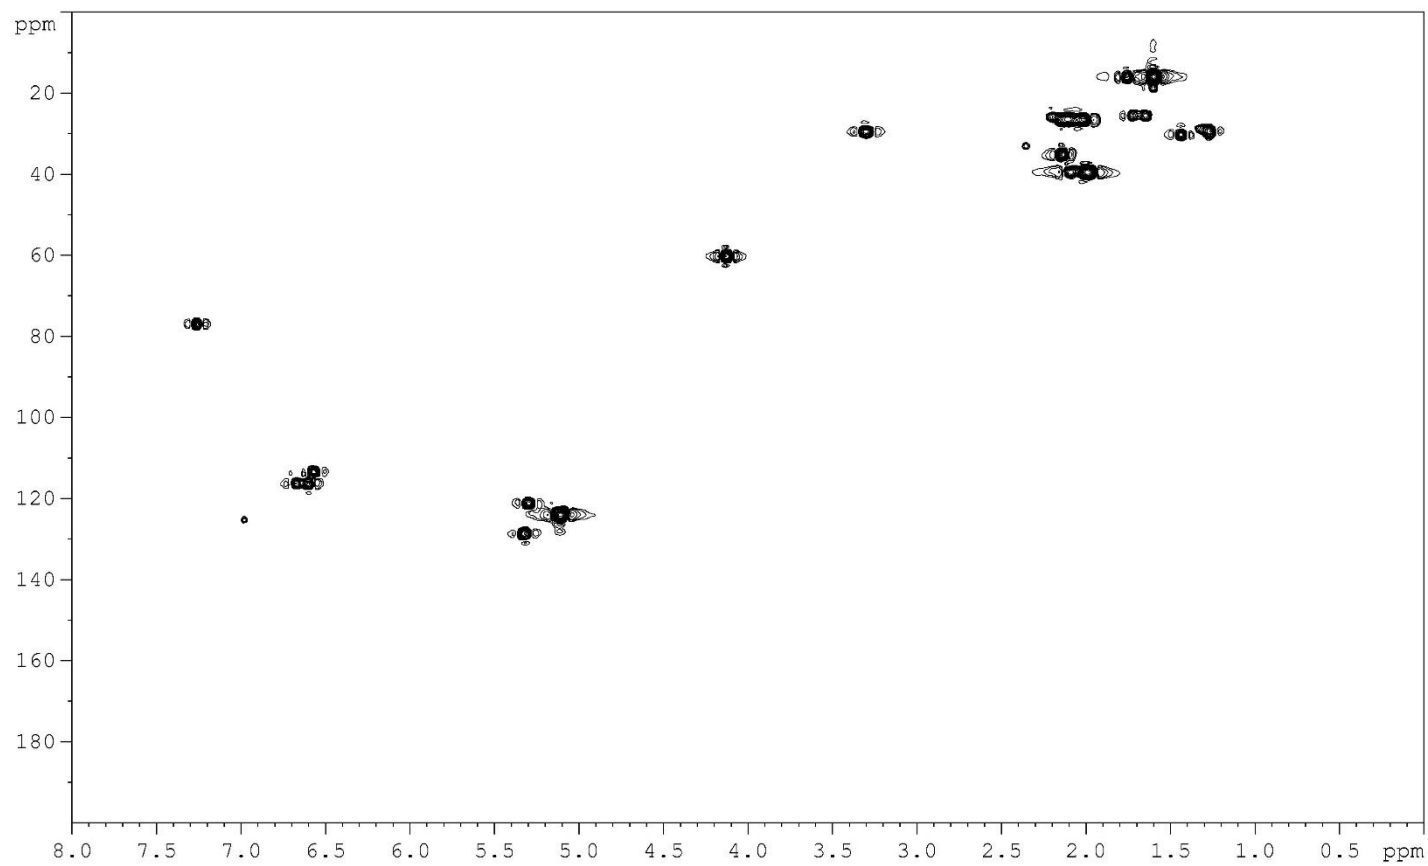

HSQC spectrum of compound **6** from *S. foetidus* (CDCl<sub>3</sub>, Bruker 400 MHz)



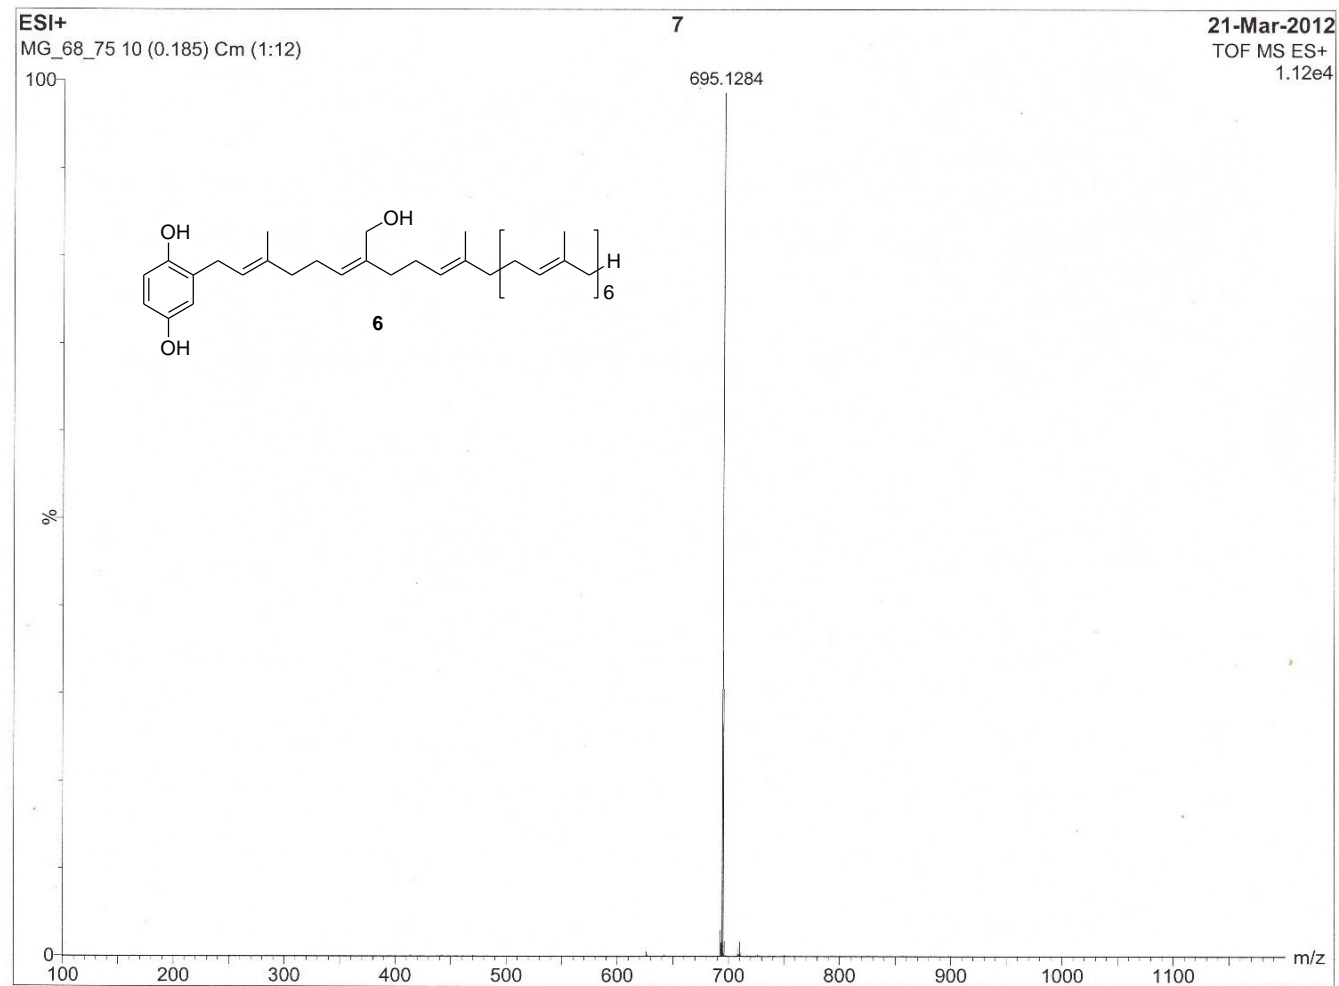ESI MS spectrum of compound **6** *S. foetidus*
